# Supplementary material for: Improving Photovoltaic Properties of P3HT:IC60BA through the Incorporation of Small Molecules
Source: MDPI journal article supplement (doi:10.3390/polym10020121), 2018-01-26
Supplement: s1 [file s1]

Supplementary information for

# Improving Photovoltaic Properties of P3HT:IC<sub>60</sub>BA Through the Incorporation of Small Molecule

Binrui Xu <sup>1,†</sup>, Gopalan Sai-Anand <sup>2,3,†</sup>, Anantha-Iyengar Gopalan <sup>4</sup>, Qiquan Qiao <sup>5</sup> and Shin-Won Kang <sup>1,\*</sup>

<sup>1</sup> School of Electronics Engineering, College of IT Engineering, Kyungpook National University, 80 Daehakro, Bukgu, Daegu 41566, Korea; kezherui123@gmail.com

<sup>2</sup> Global Innovative Center for Advanced Nanomaterials, Faculty of Engineering and Built Environment, University of Newcastle, Callaghan, NSW 2298, Australia; SaiAnand.Gopalan@newcastle.edu.au

<sup>3</sup> Future Industries Institute, Division of Information Technology, Engineering and Environment, University of South Australia, Mawson Lakes, SA 5095, Australia

<sup>4</sup> Research Institute of Advanced Energy Technology, Kyungpook National University, Daegu 41566, Korea; algopal99@gmail.com

<sup>5</sup> Center for Advanced Photovoltaics, Department of Electrical Engineering and Computer Science, South Dakota State University, Brookings, SD 570007, USA; qiquan.qiao@sdstate.edu

\* Correspondence: swkang@knu.ac.kr; Tel.: +82-053-950-6829

<sup>†</sup> These authors contributed equally to this work.

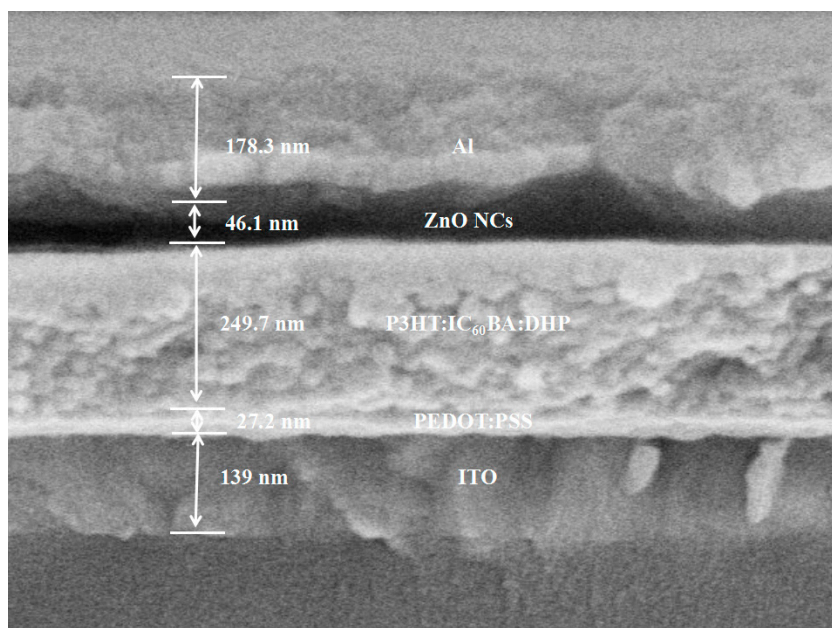

**Figure S1.** FE-SEM cross-section image of the completed device with the structure of glass/ITO/PEDOT:PSS/P3HT:ICBA:DHP/ZnO NCs/Al.

Figure S1 exhibited the Field Emission Scanning Electron Microscopy (FE-SEM) cross-section image of fabricated device with the structure of glass/ITO/poly(3,4-ethylenedioxythiophene):poly(styrene sulfonate) (PEDOT:PSS)/poly(3-hexylthiophene): indene-C<sub>60</sub>bisadduct: 2,3-dihydropyridine (P3HT:IC<sub>60</sub>BA:DHP)/zinc oxide nanocrystals (ZnO NCs)/Al. It can be seen from Figure S1,

the thickness of P3HT:IC<sub>60</sub>BA:DHP is near 250 nm which is belong to the desired thickness range (200 ~ 250 nm) to obtain reasonable performance of the fabricated BHJ-PSCs based on P3HT:IC<sub>60</sub>BA blend system [1] [2] [3].

## References

1. Tzabari, L.; Wang, J.; Lee, Y.-J.; Hsu, J.W.P.; Tessler, N. Role of charge transfer states in p3ht-fullerene solar cells. *The Journal of Physical Chemistry C* **2014**, *118*, 27681-27689.
2. Sánchez, J.G.; Ferré-Borrull, J.; Marsal, L.F.; Pallarès, J.; Balderrama, V.S.; Estrada, M. In *Performance comparison of bhj organic solar cells based on p3ht with pc70bm and icba*, 2015 IEEE International Autumn Meeting on Power, Electronics and Computing (ROPEC), 4-6 Nov. 2015, 2015; pp 1-4.
3. Nozik, A.J.; Conibeer, G.; Beard, M.C. *Advanced concepts in photovoltaics*. Royal Society of Chemistry: 2014.
